# Supplementary material for: A Validation on COVID19 Community Spreading: Probabilistic Approach&nbsp;&nbsp;
Source: Research Square preprint supplement (doi:10.21203/rs.3.rs-99507/v2), 2021-02-03
Supplement: Supplementary file 1 [file 04844f442ae91ead8c9e5fc8.docx]

**SUPPLIMENTARY FILE**

**OF**

**A VALIDATION ON COVID19 COMMUNITY SPREADING: PROBABILISTIC APPROACH**

**____________________________________________________________________________**

**Citation** (bibtex)

@article{DATTA_2020, doi = {10.31219/osf.io/3f9ct}, url = {https://doi.org/10.31219%2Fosf.io%2F3f9ct}, year = 2020, month = {apr}, publisher = {Center for Open Science}, author = {JAYDIP DATTA}, title = {Divergence {\&}amp$\mathsemicolon$ Probability Density : A Hypothesis} }


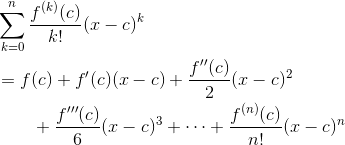


**Figure – I**

**
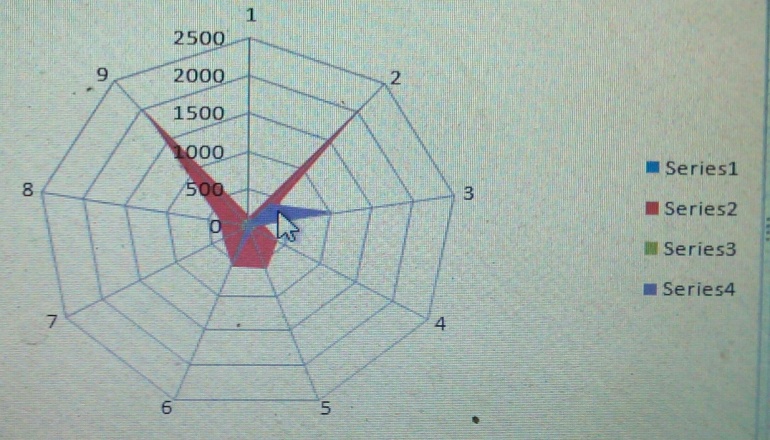
**

**Figure – II**

**Link Data -** [**https://zenodo.org/record/4492328**](https://zenodo.org/record/4492328)
